# Supplementary material for: Novel Inhibitors Induce Large Conformational Changes of GAB1 Pleckstrin Homology Domain and Kill Breast Cancer Cells
Source: PubMed Central journal article supplement (PMC4287437; doi:10.1371/journal.pcbi.1004021), 2015-01-08

**Figure S6. SPR of GAB-001, GAB-016 binding to GAB1 PH domain.**

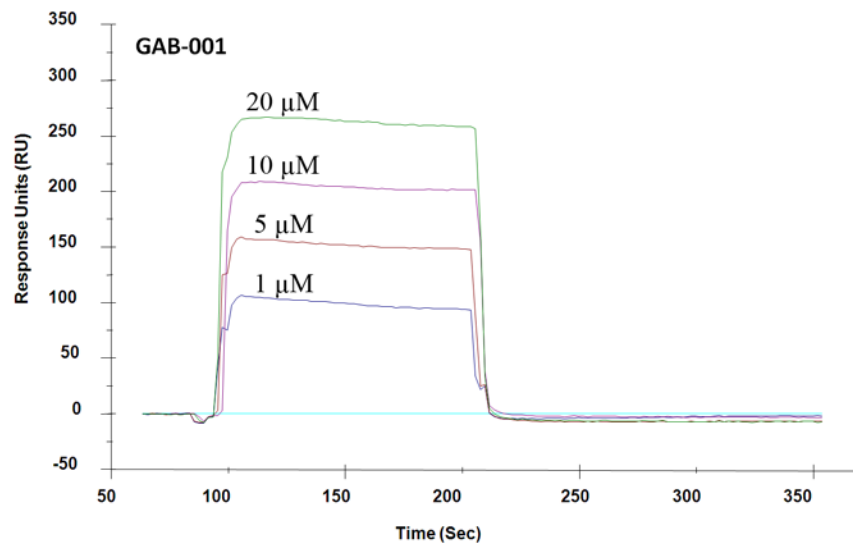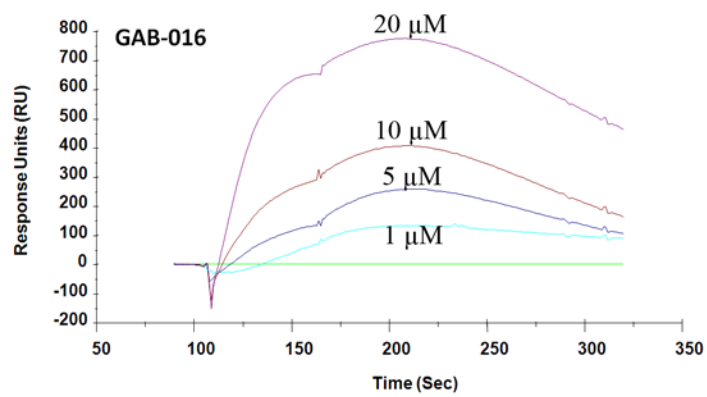

Supplement: pcbi.1004021.s006.pdf [file pcbi.1004021.s006.pdf]
